# Supplementary material for: Contamination event detection using multiple types of conventional water quality sensors in source water
Source: Royal Society of Chemistry journal article supplement (doi:10.1039/c4em00188e), 2014-01-01
Supplement: c4em00188e1.pdf [file c4em00188e1.pdf]

Supporting information:

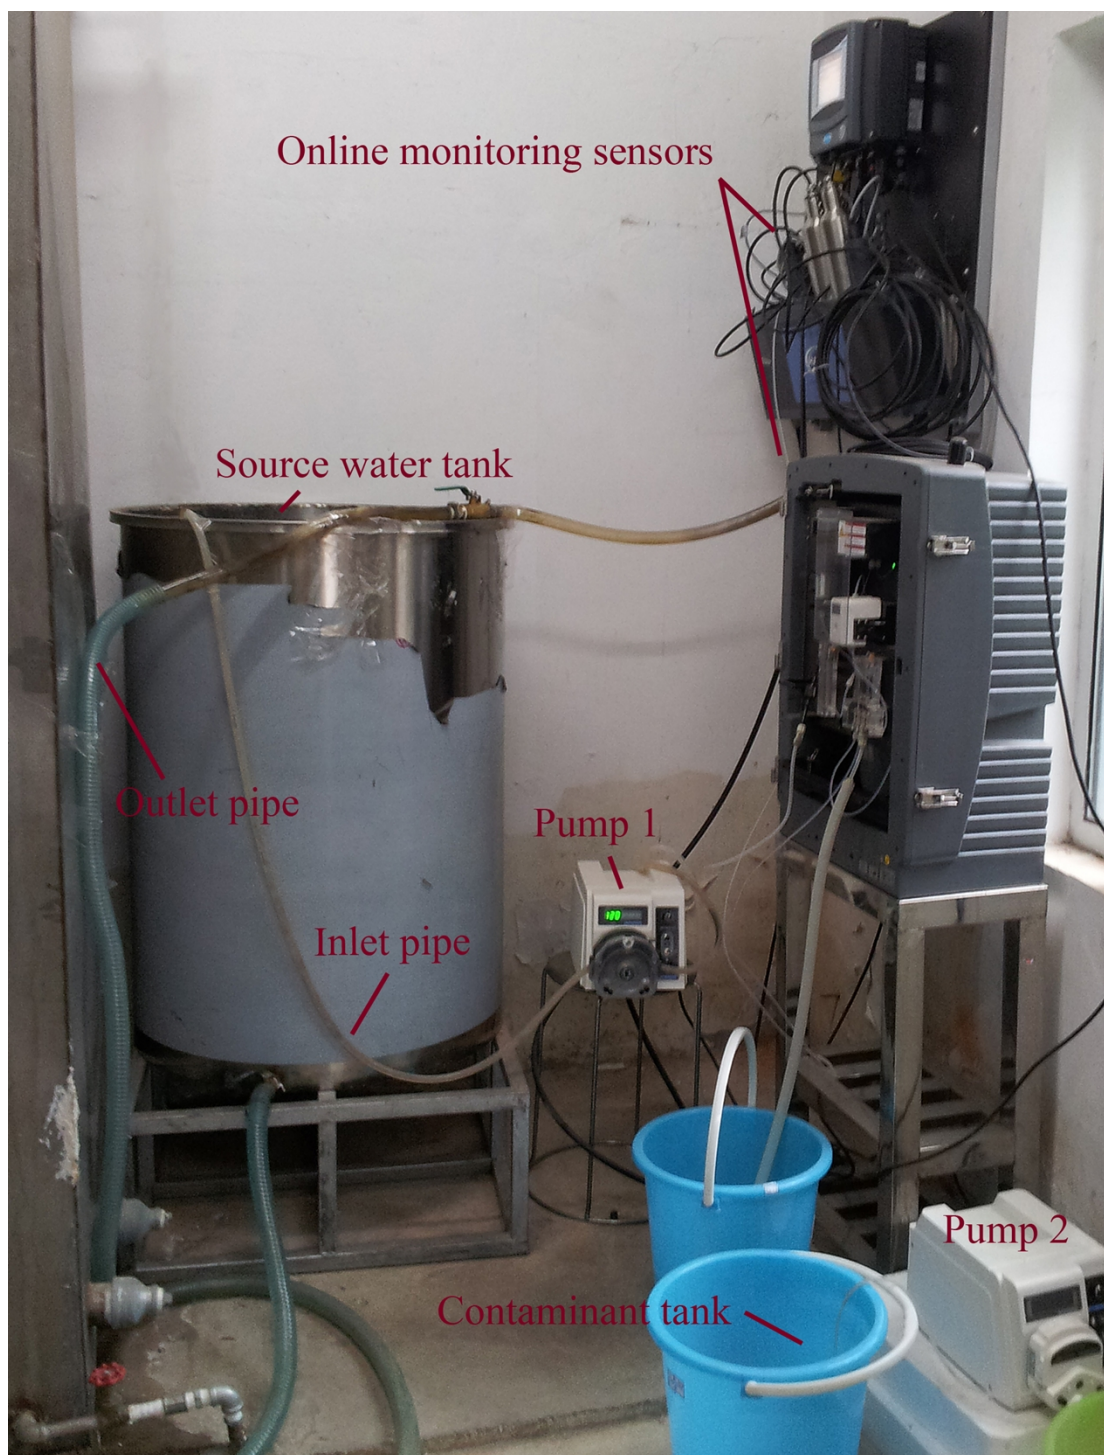

Photograph P1 photograph of Experiment set up

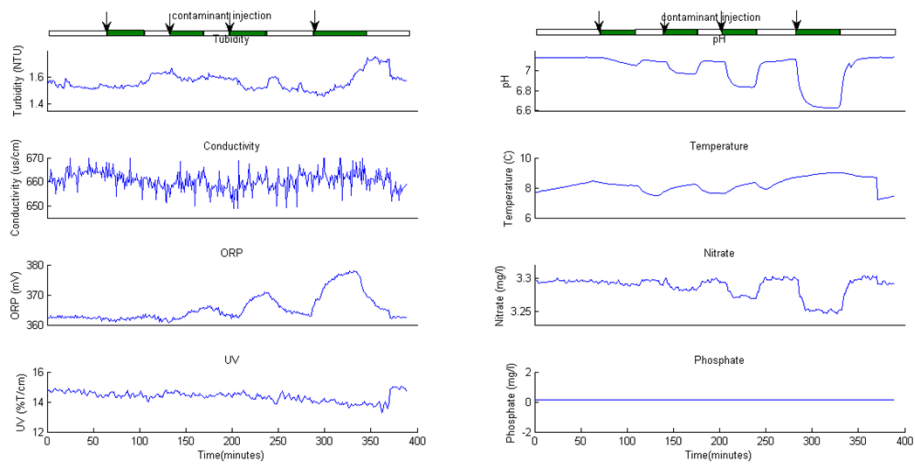

Figure F1 Sensors' responses for trivalent chromium

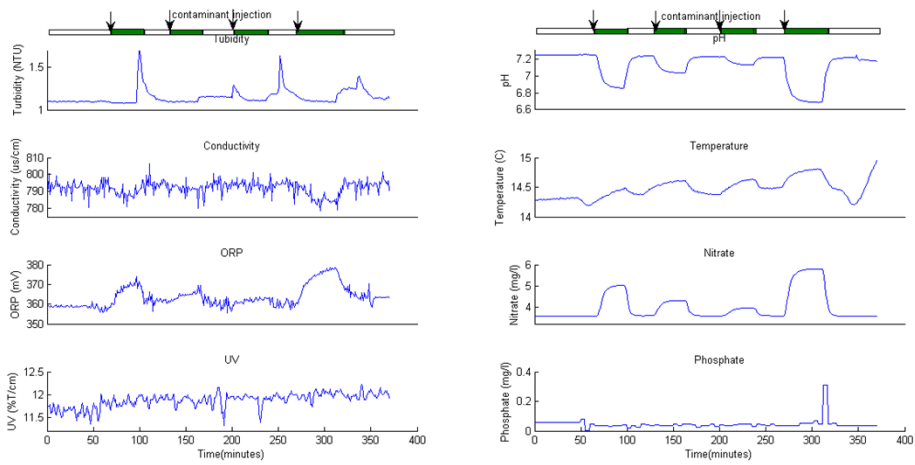

Figure F2 Sensors' responses for nickel nitrate

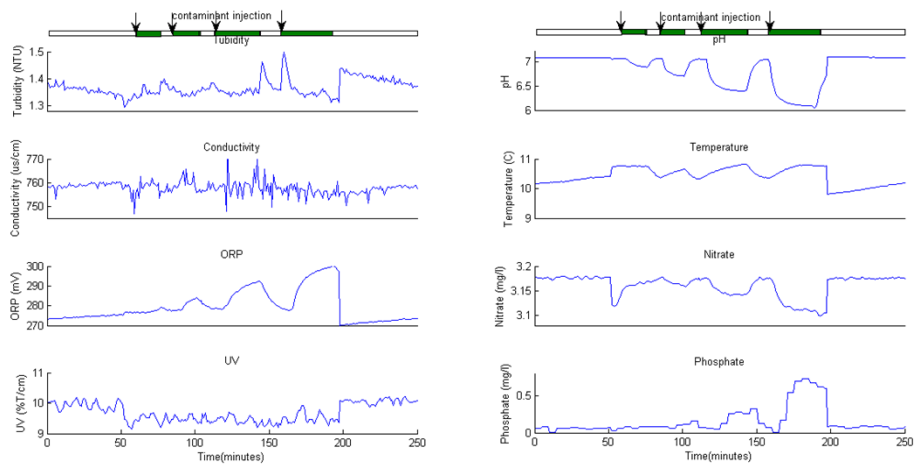

Figure F3 Sensors' responses for glyphosate

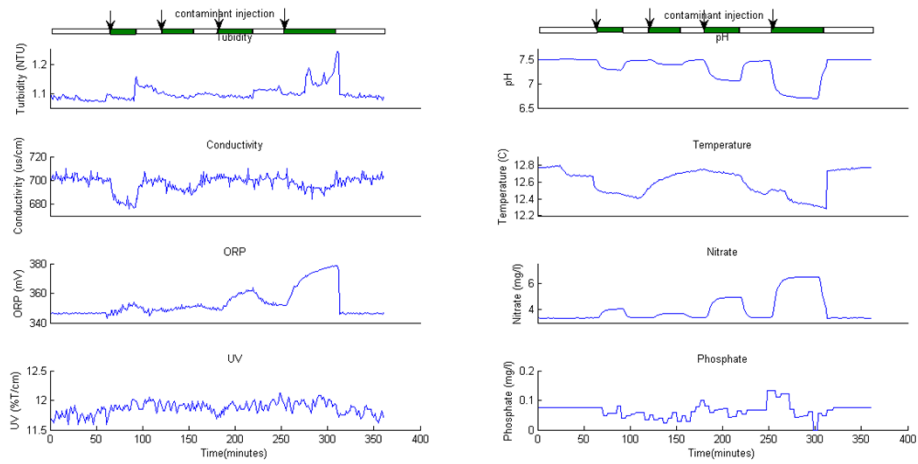

Figure F4 Sensors' responses for cadmium nitrate

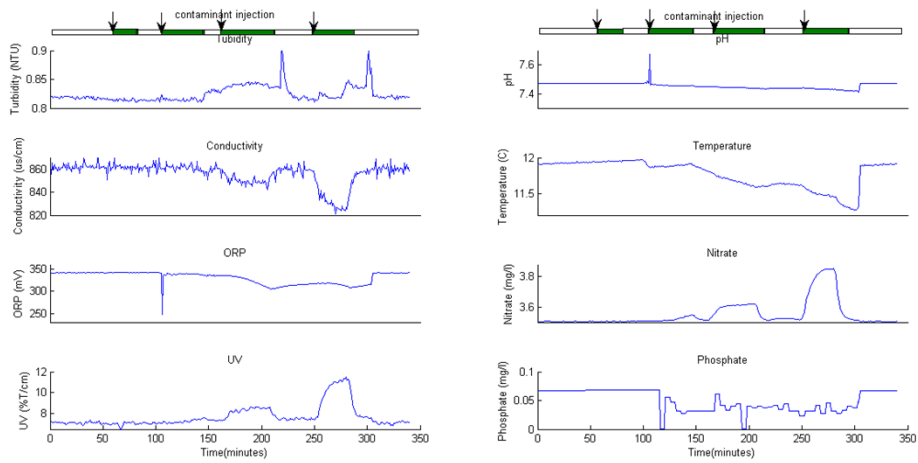

Figure F5 Sensors' responses for atrazine

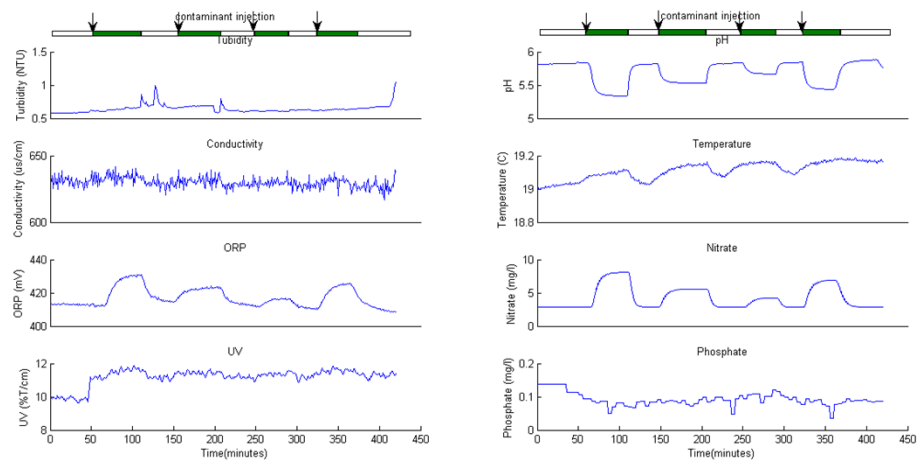

Figure F6 Sensors' responses for lead nitrate (drinking water)

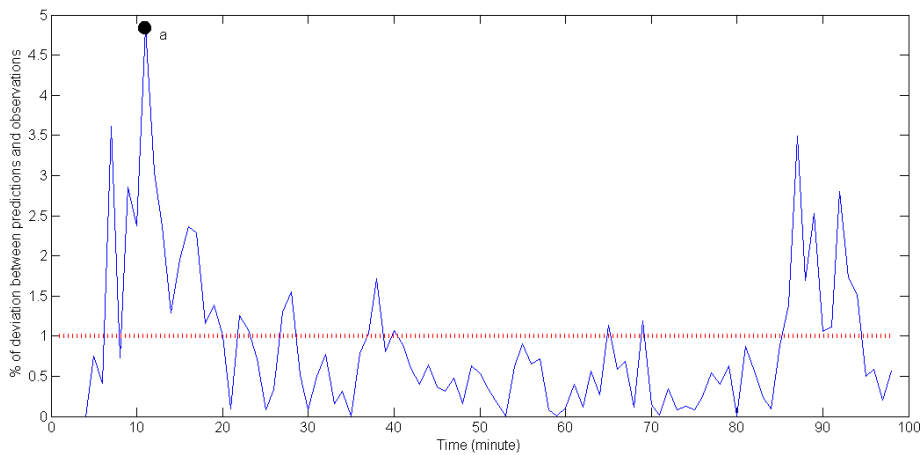

Figure F7 Deviations between predictions and observations (lead nitrate)

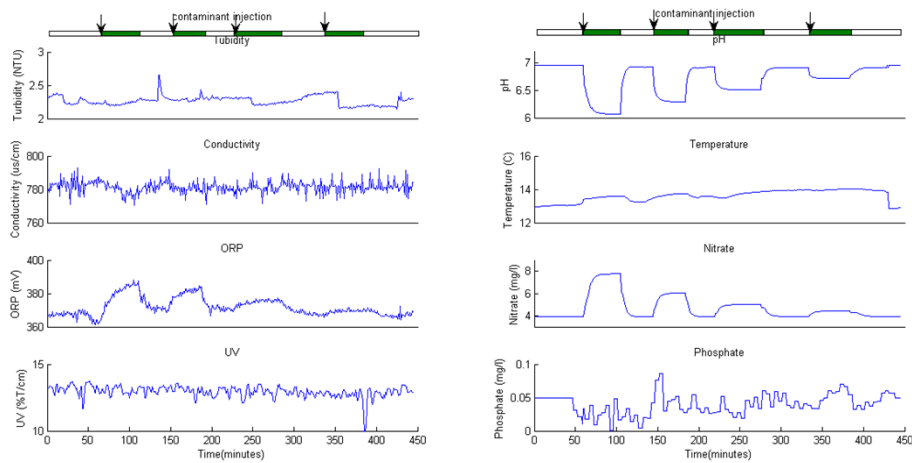

Figure F8 Sensors' response for lead nitrate (the 2<sup>nd</sup> experiment)

Table T1 The detection times of lead nitrate at different correlation indicators

| Correlative indicators<br>Concentration | 0.6 | 0.65 | 0.7 | 0.75 | 0.8 | 0.85 | 0.9 |
|-----------------------------------------|-----|------|-----|------|-----|------|-----|
| 0.01 mg/l                               | 4   | 4    | 7   | 9    | 9   | 10   | 11  |
| 0.02 mg/l                               | 1   | 1    | 1   | 1    | 1   | 10   | 11  |
| 0.04 mg/l                               | 1   | 1    | 1   | 1    | 8   | 8    | 10  |
| 0.08 mg/l                               | 1   | 1    | 1   | 1    | 6   | 7    | 7   |

$threshold_{alarm} = 8$  and  $window\ size = 30$
